# Supplementary material for: Metabotyping Patients’ Journeys Reveals Early Predisposition to Lung Injury after Cardiac Surgery
Source: PubMed Central journal article supplement (PMC5225494; doi:10.1038/srep40275), 2017-01-11
Supplement: srep40275-s1.pdf [file srep40275-s1.pdf]

1 **Supplementary data**

2

3 **for article “Metabotyping Patients’ Journeys Reveals Early Predisposition to Lung Injury after**  
4 **Cardiac Surgery”**

5

6 Raluca Georgiana Maltesen, Bodil Steen Rasmussen, Shona Pedersen, Munsoor Ali Hanifa, Sergey  
7 Kucheryavskiy, Søren Risom Kristensen, Reinhard Wimmer

8

9 **Table S1 A prolonged surgical procedure affects the metabolome.** *Association between metabolome and duration of*  
10 *surgical procedure assessed by partial least square (PLS) regression. Both the calibrated (Cal) and cross-validated (CV)*  
11 *results are provided. At 4 hours post-CPB the association was weaker, suggesting that the metabolome had begun*  
12 *normalizing after prolonged surgical stress. No significant CV association was observed at 8 and 20 hours postoperatively.*  
13 *Models with low predicted association are marked in grey.*

|          | CABG (196 ± 50 min.) |                   | CPB (64 ± 29 min.) |                   | Ischemia (33±19 min.) |                   |
|----------|----------------------|-------------------|--------------------|-------------------|-----------------------|-------------------|
|          | R <sup>2</sup> Cal   | R <sup>2</sup> CV | R <sup>2</sup> Cal | R <sup>2</sup> CV | R <sup>2</sup> Cal    | R <sup>2</sup> CV |
| 0 hour   | -                    | -                 | 0.94               | 0.76              | 0.92                  | 0.75              |
| 2 hours  | 0.9                  | 0.75              | 0.87               | 0.67              | 0.72                  | 0.54              |
| 4 hours  | 0.82                 | 0.6               | 0.7                | 0.41              | 0.7                   | 0.44              |
| 8 hours  | 0.68                 | 0.44              | 0.7                | 0.36              | 0.61                  | 0.41              |
| 20 hours | 0.74                 | 0.39              | 0.55               | 0.32              | 0.63                  | 0.38              |

14

15

16 **Table S2 Metabolite time profiles in both left atrium (LA) and pulmonary artery (PA) samples.** Mean change in  
 17 percentage was calculated using the formula:  $(\text{post-CPB} - \text{pre-CPB})/\text{pre-CPB} * 100$ . Significance was assessed by means of  
 18 factorial ANOVA with Tukey's post hoc test for multiple comparisons. Abbreviations: TMAO, trimethylamine-N-oxide; N-  
 19 Ac-Gal, N-acetyl-galactosamine; N-Ac-Glc, N-acetyl-glucosamine; FA, fatty acids; MUFA, monounsaturated fatty acids;  
 20 PUFA, polyunsaturated fatty acids; DAG, diacylglycerol; PEP, phosphoenolpyruvate; 4.60ppm\*, unassigned metabolite;  
 21 DAGPL, diacylglycerophosphocholine; PC, phosphatidylcholine; GPC, glycerophosphocholine; SM, sphingomyelin.

| Metabolites               | 0 hour     |     | 2 hours    |     | 4 hours    |     | 8 hours    |     | 20 hours   |     | p-value           |         |
|---------------------------|------------|-----|------------|-----|------------|-----|------------|-----|------------|-----|-------------------|---------|
|                           | LA         | PA  | LA         | PA  | LA         | PA  | LA         | PA  | LA         | PA  | LA                | PA      |
| <b>Trigonelline</b>       | <b>-15</b> | -17 | <b>-32</b> | -38 | <b>-45</b> | -46 | <b>-50</b> | -53 | <b>-49</b> | -63 | <b>0.010</b>      | 0.001   |
| <b>Formate</b>            | <b>2</b>   | 1   | <b>-13</b> | -15 | <b>-20</b> | -20 | <b>-19</b> | -21 | <b>-16</b> | -14 | <b>&lt;0.0001</b> | <0.0001 |
| <b>Inosine</b>            | <b>-14</b> | -18 | <b>-27</b> | -25 | <b>-28</b> | -29 | <b>-24</b> | -25 | <b>-24</b> | -30 | <b>&lt;0.0001</b> | <0.0001 |
| <b>Hypoxanthine</b>       | <b>-13</b> | -12 | <b>-6</b>  | -4  | <b>-9</b>  | -7  | <b>4</b>   | 0   | <b>12</b>  | 8   | <b>&lt;0.0001</b> | <0.0001 |
| <b>Adenine</b>            | <b>6</b>   | 12  | <b>56</b>  | 45  | <b>51</b>  | 47  | <b>67</b>  | 67  | <b>65</b>  | 54  | <b>&lt;0.0001</b> | <0.0001 |
| <b>Tryptophan</b>         | <b>-25</b> | -22 | <b>-29</b> | -28 | <b>-28</b> | -27 | <b>-19</b> | -22 | <b>-10</b> | -10 | <b>&lt;0.0001</b> | <0.0001 |
| <b>Histidine</b>          | <b>-1</b>  | -1  | <b>-9</b>  | -11 | <b>-14</b> | -15 | <b>-13</b> | -14 | <b>-14</b> | -16 | <b>&lt;0.0001</b> | <0.0001 |
| <b>3-Methylhistidine</b>  | <b>4</b>   | 4   | <b>11</b>  | 9   | <b>6</b>   | 6   | <b>14</b>  | 15  | <b>36</b>  | 32  | <b>&lt;0.0001</b> | <0.0001 |
| <b>1- Methylhistidine</b> | <b>-7</b>  | -10 | <b>-7</b>  | -11 | <b>-12</b> | -14 | <b>-5</b>  | -9  | <b>6</b>   | 0   | <b>&lt;0.0001</b> | <0.0001 |
| <b>Phenylalanine</b>      | <b>4</b>   | 4   | <b>1</b>   | -1  | <b>1</b>   | -1  | <b>-4</b>  | -6  | <b>8</b>   | 6   | <b>0.03</b>       | 0.02    |
| <b>Uric acid</b>          | <b>-6</b>  | -8  | <b>-13</b> | -17 | <b>-13</b> | -16 | <b>-2</b>  | -6  | <b>24</b>  | 17  | <b>&lt;0.0001</b> | <0.0001 |
| <b>Tyrosine</b>           | <b>4</b>   | 3   | <b>-13</b> | -15 | <b>-15</b> | -16 | <b>-18</b> | -19 | <b>-13</b> | -16 | <b>&lt;0.0001</b> | <0.0001 |
| <b>Glucuronate</b>        | <b>5</b>   | 6   | <b>15</b>  | 13  | <b>9</b>   | 9   | <b>30</b>  | 26  | <b>100</b> | 94  | <b>&lt;0.0001</b> | <0.0001 |
| <b>Xanthine</b>           | <b>-16</b> | -16 | <b>-26</b> | -26 | <b>-24</b> | -25 | <b>-14</b> | -16 | <b>5</b>   | 3   | <b>&lt;0.0001</b> | <0.0001 |
| <b>L-Dopa</b>             | <b>0</b>   | -1  | <b>-8</b>  | -10 | <b>-11</b> | -12 | <b>-11</b> | -12 | <b>-7</b>  | -9  | <b>&lt;0.0001</b> | <0.0001 |
| <b>Fumarate</b>           | <b>2</b>   | 1   | <b>-11</b> | -13 | <b>-9</b>  | -9  | <b>7</b>   | -1  | <b>8</b>   | 3   | <b>0.04</b>       | 0.21    |
| <b>Uridine</b>            | <b>4</b>   | 3   | <b>-5</b>  | -7  | <b>-9</b>  | -9  | <b>-14</b> | -15 | <b>-23</b> | -28 | <b>&lt;0.0001</b> | <0.0001 |
| <b>Urea</b>               | <b>3</b>   | 1   | <b>4</b>   | 1   | <b>5</b>   | 4   | <b>-4</b>  | -6  | <b>-24</b> | -27 | <b>&lt;0.0001</b> | <0.0001 |
| <b>MUFA</b>               | <b>-25</b> | -25 | <b>49</b>  | 46  | <b>77</b>  | 76  | <b>76</b>  | 75  | <b>63</b>  | 59  | <b>&lt;0.0001</b> | <0.0001 |
| <b>TAG</b>                | <b>-7</b>  | -9  | <b>123</b> | 123 | <b>159</b> | 162 | <b>146</b> | 147 | <b>136</b> | 134 | <b>&lt;0.0001</b> | <0.0001 |

|                   |     |     |     |     |     |     |     |     |     |     |         |         |
|-------------------|-----|-----|-----|-----|-----|-----|-----|-----|-----|-----|---------|---------|
| N-Ac-Glc          | 5   | 4   | 17  | 16  | 26  | 27  | 41  | 41  | 60  | 59  | <0.0001 | <0.0001 |
| DAG               | 15  | 13  | 6   | 8   | 4   | 6   | 12  | 12  | 19  | 14  | 0.001   | 0.02    |
| PEP               | 10  | 7   | 22  | 20  | 30  | 30  | 16  | 15  | -21 | -21 | <0.0001 | <0.0001 |
| N-Ac-Gal          | 16  | 21  | 15  | 13  | 13  | 18  | -22 | -23 | -61 | -56 | <0.0001 | <0.0001 |
| $\beta$ -Glucose  | 38  | 39  | 15  | 14  | 11  | 12  | 17  | 17  | 13  | 13  | <0.0001 | <0.0001 |
| 4.60 ppm*         | -27 | -25 | -24 | -27 | -18 | -20 | -8  | -12 | 27  | 31  | <0.0001 | <0.0001 |
| Malic acid        | -7  | -3  | -31 | -33 | -39 | -39 | -39 | -39 | -41 | -37 | <0.0001 | <0.0001 |
| Ascorbate         | 2   | 10  | -27 | -28 | -27 | -28 | -21 | -22 | -19 | -9  | <0.0001 | <0.0001 |
| DAGPL             | -25 | -19 | -46 | -48 | -47 | -48 | -41 | -43 | -22 | -16 | <0.0001 | <0.0001 |
| PC                | -18 | -17 | -3  | -6  | 2   | 1   | -1  | -3  | 1   | 1   | <0.0001 | <0.0001 |
| GPC               | -7  | -7  | -14 | -16 | -14 | -17 | -14 | -16 | -10 | -11 | <0.0001 | <0.0001 |
| Lactate           | 36  | 33  | 5   | 0   | 6   | 2   | -1  | -4  | -7  | -11 | <0.0001 | <0.0001 |
| Glycerol          | 11  | 10  | 26  | 20  | 34  | 32  | 1   | -1  | -45 | -46 | <0.0001 | <0.0001 |
| Glycine           | -3  | -4  | -7  | -11 | -12 | -13 | -20 | -21 | -30 | -33 | <0.0001 | <0.0001 |
| $\alpha$ -Glucose | 36  | 36  | 16  | 14  | 12  | 13  | 18  | 18  | 12  | 11  | <0.0001 | <0.0001 |
| Taurine           | -1  | -2  | -10 | -11 | -14 | -13 | -17 | -17 | -25 | -26 | <0.0001 | <0.0001 |
| Choline, SM       | -17 | -18 | -9  | -10 | -3  | -4  | 3   | 2   | 1   | 1   | <0.0001 | <0.0001 |
| TMAO              | -4  | -5  | -10 | -12 | -14 | -14 | -15 | -16 | -18 | -21 | 0.03    | 0.007   |
| Malonate          | -1  | -2  | -4  | -6  | -7  | -6  | -8  | -7  | -7  | -8  | 0.80    | 0.81    |
| Creatinine        | -2  | -2  | -3  | -3  | -4  | -4  | -4  | -4  | -5  | -6  | 0.09    | 0.04    |
| Creatine          | 31  | 33  | 29  | 26  | 19  | 23  | 15  | 12  | 8   | 9   | <0.0001 | <0.0001 |
| Lipoic acid       | -5  | -5  | -15 | -17 | -39 | -38 | -58 | -59 | -72 | -72 | <0.0001 | <0.0001 |
| PUFA              | -27 | -27 | 38  | 35  | 60  | 59  | 62  | 61  | 59  | 58  | <0.0001 | <0.0001 |
| Citrate           | 28  | 30  | 27  | 25  | 41  | 41  | 22  | 22  | 2   | 2   | 0.01    | 0.01    |
| Glutamine         | -1  | -1  | -17 | -18 | -24 | -24 | -24 | -24 | -26 | -28 | <0.0001 | <0.0001 |
| Pyruvate          | 67  | 61  | 36  | 29  | 38  | 35  | 32  | 28  | 41  | 33  | <0.0001 | <0.0001 |

|                                    |            |     |            |     |            |     |            |     |            |     |                   |         |
|------------------------------------|------------|-----|------------|-----|------------|-----|------------|-----|------------|-----|-------------------|---------|
| <b>Glutamate</b>                   | <b>1</b>   | 0   | <b>-2</b>  | -3  | <b>-4</b>  | -5  | <b>-7</b>  | -7  | <b>-5</b>  | -6  | <b>0.21</b>       | 0.15    |
| <b>3-HBA</b>                       | <b>-17</b> | -17 | <b>-19</b> | -20 | <b>-14</b> | -15 | <b>-5</b>  | -6  | <b>-13</b> | -14 | <b>0.007</b>      | 0.003   |
| <b>Acetoacetic acid</b>            | <b>-23</b> | -23 | <b>-8</b>  | -8  | <b>0</b>   | 1   | <b>9</b>   | 8   | <b>-25</b> | -26 | <b>0.02</b>       | 0.02    |
| <b>Acetone</b>                     | <b>5</b>   | -1  | <b>108</b> | 96  | <b>139</b> | 132 | <b>146</b> | 134 | <b>97</b>  | 87  | <b>&lt;0.0001</b> | <0.0001 |
| <b>Acetate</b>                     | <b>-18</b> | -20 | <b>-37</b> | -39 | <b>-44</b> | -44 | <b>-48</b> | -48 | <b>-74</b> | -74 | <b>&lt;0.0001</b> | <0.0001 |
| <b>Lysine</b>                      | <b>-3</b>  | -3  | <b>-9</b>  | -11 | <b>-18</b> | -19 | <b>-23</b> | -24 | <b>-30</b> | -32 | <b>&lt;0.0001</b> | <0.0001 |
| <b>Proline</b>                     | <b>-3</b>  | -3  | <b>-10</b> | -11 | <b>-18</b> | -18 | <b>-22</b> | -23 | <b>-24</b> | -26 | <b>&lt;0.0001</b> | <0.0001 |
| <b>Arginine</b>                    | <b>-6</b>  | -6  | <b>-9</b>  | -10 | <b>-20</b> | -20 | <b>-30</b> | -31 | <b>-39</b> | -39 | <b>&lt;0.0001</b> | <0.0001 |
| <b>Free FA</b>                     | <b>-29</b> | -30 | <b>221</b> | 206 | <b>266</b> | 260 | <b>226</b> | 219 | <b>222</b> | 208 | <b>&lt;0.0001</b> | <0.0001 |
| <b>Alanine</b>                     | <b>16</b>  | 15  | <b>-3</b>  | -6  | <b>-11</b> | -11 | <b>-10</b> | -10 | <b>-10</b> | -13 | <b>&lt;0.0001</b> | <0.0001 |
| <b>Ethanol</b>                     | <b>-45</b> | -46 | <b>-31</b> | -35 | <b>-34</b> | -32 | <b>-35</b> | -34 | <b>-36</b> | -35 | <b>&lt;0.0001</b> | <0.0001 |
| <b>Isobutyrylglycine</b>           | <b>-12</b> | -13 | <b>-29</b> | -30 | <b>-42</b> | -42 | <b>-55</b> | -55 | <b>-70</b> | -71 | <b>&lt;0.0001</b> | <0.0001 |
| <b>Isobutyrate &amp; Carnitine</b> | <b>-7</b>  | -7  | <b>-9</b>  | -11 | <b>-16</b> | -18 | <b>-31</b> | -32 | <b>-41</b> | -42 | <b>&lt;0.0001</b> | <0.0001 |
| <b>Valine</b>                      | <b>-3</b>  | -3  | <b>-9</b>  | -11 | <b>-18</b> | -17 | <b>-25</b> | -26 | <b>-33</b> | -35 | <b>&lt;0.0001</b> | <0.0001 |
| <b>Isoleucine</b>                  | <b>-14</b> | -14 | <b>-28</b> | -30 | <b>-39</b> | -39 | <b>-44</b> | -44 | <b>-33</b> | -35 | <b>&lt;0.0001</b> | <0.0001 |
| <b>Leucine</b>                     | <b>-7</b>  | -8  | <b>-5</b>  | -7  | <b>-8</b>  | -9  | <b>-11</b> | -13 | <b>-11</b> | -14 | <b>0.004</b>      | 0.000   |
| <b>Lipoprotein</b>                 | <b>-30</b> | -30 | <b>30</b>  | 28  | <b>52</b>  | 52  | <b>60</b>  | 58  | <b>64</b>  | 60  | <b>&lt;0.0001</b> | <0.0001 |
| <b>Total Cholesterol</b>           | <b>-32</b> | -35 | <b>1</b>   | 0   | <b>20</b>  | 18  | <b>33</b>  | 30  | <b>38</b>  | 28  | <b>&lt;0.0001</b> | <0.0001 |

22

23

24

25 **Table S3 Early prediction of hypoxaemia.** *Partial least squares (PLS) regression and partial least squares –discriminant*  
 26 *analysis (PLS-DA) results. The results show both the calibrated (Cal) and Venetian-Blinds cross-validated (CV) coefficient*  
 27 *of association ( $R^2$ ), specificity, sensitivity, and class error. Each model was built on 100 samples collected from 50 patients*  
 28 *from the left atrium and pulmonary artery at one of the mentioned time points. For validation, the Venetian-Blinds cross-*  
 29 *validation with 10 segments was applied. 10 consecutive samples were removed and a model was created. Subsequently, the*  
 30 *10 samples were predicted. This procedure was repeated until all samples were removed once. Permutation testing was*  
 31 *applied for each model. A p-value  $\leq 0.004$  was considered significant.*

|                 | PLS regression (Metabolome vs. PaO <sub>2</sub> ) |       |      |      |             | PLS-DA (Metabolome vs. Outcome (hypoxaemia: yes/no)) |      |             |      |             |      |             |
|-----------------|---------------------------------------------------|-------|------|------|-------------|------------------------------------------------------|------|-------------|------|-------------|------|-------------|
|                 | R <sup>2</sup>                                    |       | RMSE |      | Permutation | Sensitivity                                          |      | Specificity |      | Class error |      | Permutation |
|                 | Cal                                               | CV    | Cal  | CV   | p-value     | Cal                                                  | CV   | Cal         | CV   | Cal         | CV   | p-value     |
| <b>Pre-CPB</b>  | 0.94                                              | 0.707 | 0.33 | 0.75 | 0.004       | 0.83                                                 | 0.78 | 0.95        | 0.84 | 0.11        | 0.19 | 0.004       |
| <b>0 hour</b>   | 0.98                                              | 0.918 | 0.15 | 0.4  | <0.001      | 1                                                    | 0.88 | 0.98        | 0.92 | 0.01        | 0.1  | <0.001      |
| <b>2 hours</b>  | 0.98                                              | 0.934 | 0.13 | 0.36 | <0.001      | 1                                                    | 0.91 | 0.98        | 0.94 | 0.01        | 0.1  | <0.001      |
| <b>4 hours</b>  | 0.98                                              | 0.954 | 0.12 | 0.3  | <0.001      | 0.97                                                 | 0.88 | 0.92        | 0.88 | 0.06        | 0.12 | <0.001      |
| <b>8 hours</b>  | 0.98                                              | 0.941 | 0.13 | 0.34 | <0.001      | 0.97                                                 | 0.94 | 0.97        | 0.92 | 0.03        | 0.07 | <0.001      |
| <b>20 hours</b> | 0.98                                              | 0.903 | 0.19 | 0.44 | <0.001      | 0.96                                                 | 0.93 | 0.97        | 0.91 | 0.04        | 0.08 | <0.001      |

32

33
